# Supplementary material
Source: PubMed Central journal article supplement (PMC5826167)
Supplement: AAC.02295-17_zac003186967s1.pdf [file AAC.02295-17_zac003186967s1.pdf]

1 Supplementary file

2

3 **Table S1.** Summary of culture results according to the source of the samples pigs

| Province  | No of farms    | No of pigs sampled | No of farms with positive result | No of pigs with positive result |
|-----------|----------------|--------------------|----------------------------------|---------------------------------|
| Fujian    | 1              | 1                  | 0                                | 0                               |
| Guangdong | 88             | 440                | 3                                | 3                               |
| Guangxi   | 5              | 10                 | 0                                | 0                               |
| Hainan    | 2              | 11                 | 0                                | 0                               |
| Henan     | 12             | 25                 | 2                                | 2                               |
| Hubei     | 9              | 23                 | 0                                | 0                               |
| Hunan     | 24             | 108                | 1                                | 1                               |
| Jiangsu   | 5              | 21                 | 0                                | 0                               |
| Jiangxi   | 19             | 97                 | 0                                | 0                               |
| Zhejiang  | 3              | 6                  | 0                                | 0                               |
| Hong Kong | - <sup>a</sup> | 114                | 0                                | 0                               |
| Total     | 168            | 856                | 6                                | 6                               |

4 <sup>a</sup>Information not available

5

6

7 **Table S2** Summary of the five IncX3 plasmids carrying *bla*<sub>NDM-5</sub>

| Strain   | Plasmid name | Size (bp) | No of putative ORFs | Average depth of coverage | Accession no. |
|----------|--------------|-----------|---------------------|---------------------------|---------------|
| P744T    | pP744-NDM5   | 45,546    | 46                  | 177                       | MF547511      |
| P768-11  | pP768-NDM5   | 46,161    | 46                  | 266                       | MF547510      |
| P785     | pP785-NDM5   | 46,161    | 46                  | 384                       | MF547509      |
| P788A-32 | pP788A-NDM5  | 46,161    | 46                  | 274                       | MF547507      |
| P855     | pP855-NDM5   | 46,161    | 46                  | 235                       | MF547508      |

8

9

10 **Table S3.** Summary of 22 IncX3 pP768-NDM-5 like plasmids identified in the Genbank

|                 | NDM allele | Geographical origin <sup>a</sup> | Species <sup>b</sup> | Accession | Plasmid size, bp (query coverage/identity) <sup>c</sup> | Host source | Year collected | Genetic load region, bp <sup>d</sup> |
|-----------------|------------|----------------------------------|----------------------|-----------|---------------------------------------------------------|-------------|----------------|--------------------------------------|
| pCREC-A6-NDM    | NDM-1      | China                            | EC                   | KX960109  | 46,037 (100.0%/99.7%)                                   | Human       | -              | 16,002                               |
| pSCE516-2       | NDM-1      | China                            | EC                   | KX023261  | 46,254 (100.0%/99.9%)                                   | Chicken     | 2015           | 16,071                               |
| pM213_X3        | NDM-4      | Myanmar                          | EC                   | AP018142  | 43,534 (100.0%/99.9%)                                   | Human       | 2015           | 13,443                               |
| pM216_X3        | NDM-4      | Myanmar                          | EC                   | AP018146  | 46,161 (100.0%/99.9%)                                   | Human       | 2015           | 16,070                               |
| pJEG027         | NDM-4      | Myanmar                          | KP                   | KM400601  | 46,253 (100.0%/99.8%)                                   | Human       | -              | 16,070                               |
| pNDM5_IncX3     | NDM-5      | China                            | KP                   | KU761328  | 46,161 (100.0%/99.9%)                                   | Human       | 2015           | 16,070                               |
| pEc1929         | NDM-5      | China                            | EC                   | KT824791  | 46,164 (100.0%/99.9%)                                   | Human       | 2014           | 16,071                               |
| pECNDM101       | NDM-5      | China                            | EC                   | KX507346  | 46,165 (100.0%/99.9%)                                   | Pig         | -              | 16,073                               |
| pZHDC40         | NDM-5      | China                            | EC                   | KY041843  | 45,346 (98.2%/100.0%)                                   | Human       | 2015           | 15,255                               |
| pNDM5_WCHEC0215 | NDM-5      | China                            | EC                   | KY435936  | 47,337 (100.0%/97.4%)                                   | Human       | -              | 17,268                               |
| pK518_NDM5      | NDM-5      | China (ZJ)                       | KM                   | CP023188  | 46,146 (100.0%/99.9%)                                   | Human       | 2017           | 16,070                               |
| pK516_NDM5      | NDM-5      | China (ZJ)                       | KM                   | CP022351  | 46,149 (100.0%/99.9%)                                   | Human       | 2017           | 16,070                               |
| NUHL24835       | NDM-5      | China (JX)                       | KP                   | CP014006  | 46,161 (100.0%/99.9%)                                   | Human       | 2014           | 16,070                               |
| pNDM-QD28       | NDM-5      | China (QD)                       | EC                   | KU167608  | 46,161 (100.0%/99.9%)                                   | Human       | 2013           | 16,070                               |
| pNDM-QD29       | NDM-5      | China (QD)                       | EC                   | KU167609  | 46,161 (100.0%/99.9%)                                   | Human       | 2013           | 16,070                               |
| pNDM-MGR194     | NDM-5      | India                            | KP                   | KF220657  | 46,253 (100.0%/99.9%)                                   | Human       | 2011-13        | 16,070                               |
| pKpN01-NDM7     | NDM-7      | Canada                           | KP                   | CP012990  | 46,161 (100.0%/99.9%)                                   | Human       | 2013           | 16,070                               |
| pEC50-NDM7      | NDM-7      | China                            | EC                   | KX470735  | 46,161 (100.0%/99.9%)                                   | Human       | -              | 16,070                               |
| pKW53TNDM       | NDM-7      | Kuwait                           | EC                   | KX214669  | 46,161 (100.0%/99.9%)                                   | Human       | 2012           | 16,070                               |
| pM110_X3        | NDM-7      | Myanmar                          | EC                   | AP018141  | 45,122 (97.7%/99.9%)                                    | Human       | 2015           | 15,031                               |
| pOM26-1         | NDM-7      | Oman                             | EC                   | KP776609  | 45,122 (97.7%/99.9%)                                    | Human       | -              | 15,031                               |
| pAD-19R         | NDM-17     | China (SD)                       | EC                   | KX833071  | 46,161 (100.0%/99.9%)                                   | Chicken     | 2015           | 16,070                               |

11 <sup>a</sup> GD, Guangdong; BJ, Beijing; HN, Henan; JS, Jiangsu; JX, Jiangxi; QD, Qingdao; SD, Shandong; ZJ, Zhejiang.

12 <sup>b</sup> EC, *Escherichia coli*; KP, *Klebsiella pneumoniae*; KM, *Klebsiella michiganensis*

13 <sup>c</sup> Percentages coverage and identity by using pP768-NDM-5 as a reference

14 <sup>d</sup> The genetic load region is between the resolvase gene and the *hms* gene. In pP768-NDM5, the genetic load region is 16,070 bp in length. In all  
15 the plasmids, ISL3 and IS5 were inserted at the same positions and in the same orientations as in pP768-NDM5.
